# Supplementary material for: Marine mammals and sea turtles listed under the U.S. Endangered Species Act are recovering
Source: PubMed Central journal article supplement (PMC6334928; doi:10.1371/journal.pone.0210164), 2019-01-16
Supplement: pone.0210164.s002.pdf [file pone.0210164.s002.pdf]

**S2 Table. Final model parameters used to determining location-specific population trends.** Model type consisted of linear model (*lm*), generalized linear model (*glm*), generalized least squatted model (*gls*), or generalized additive model (*gam*). Abundance was log transformed in some instances and indicated with a (log) next to model type. Family (link) is the description of the error distribution and link function used in the models. Correlation and variance structures were used only for *gls* models to account for temporal autocorrelation and heteroscedasticity structure, respectively. P-values for each model are shown. Final models were obtained through an iterative model selection using AICc.

| Common Name         | DPS/Stock/Pop                           | Pop. Trend<br>(↑→↓) | Model type | Family (link)       | Variance Structure | Correlation structure | P-value  |
|---------------------|-----------------------------------------|---------------------|------------|---------------------|--------------------|-----------------------|----------|
| <b>Cetacean</b>     |                                         |                     |            |                     |                    |                       |          |
| Beluga whale        | Cook Inlet DPS                          | →                   | <i>glm</i> | Poisson (log)       | –                  | –                     | 0.17900  |
| Blue whale          | Eastern North Pacific Stock             | ↑                   | <i>gam</i> | Poisson (identity)  | –                  | –                     | 0.00506  |
| Bowhead whale       | Western Arctic Stock                    | ↑                   | <i>gls</i> | Gaussian            | –                  | corAR1                | <0.00001 |
| Fin whale           | CA, OR, WA Stock                        | ↑                   | <i>gls</i> | Gaussian            | –                  | –                     | <0.00005 |
| Fin whale           | Western North Atlantic Stock            | →                   | <i>gls</i> | Gaussian            | –                  | –                     | 0.61690  |
| Grey whale          | Eastern North Pacific Stock – <i>d.</i> | ↑                   | <i>gam</i> | Gaussian (log)      | –                  | –                     | 0.00144  |
| Grey whale          | Western North Pacific Stock             | ↑                   | <i>gam</i> | Gaussian (log)      | –                  | –                     | <0.00001 |
| Humpback whale      | Central America DPS (CA/OR)             | ↑                   | <i>gls</i> | Gaussian            | varExp             | corAR1                | <0.00001 |
| Humpback whale      | Hawaii DPS – <i>d.</i>                  | ↑                   | <i>gam</i> | Gamma (log)         | –                  | –                     | 0.00004  |
| Humpback whale      | Mexico DPS (SE AK – AK P.)              | ↑                   | <i>gls</i> | Gaussian            | varPower           | corAR1                | <0.00001 |
| Humpback whale      | West Indies DPS – <i>d.</i>             | ↑                   | <i>gls</i> | Gaussian            | varPower           | corAR1                | 0.00160  |
| Killer whale        | Southern Resident DPS                   | ↓                   | <i>glm</i> | Gaussian (identity) | –                  | –                     | 0.00024  |
| N. Atl. right whale | North Atlantic – (90-10)                | ↑                   | <i>gam</i> | Gamma (log)         | –                  | –                     | <0.00001 |
| Sei whale           | Eastern North Pacific Stock             | ↑                   | <i>gam</i> | Gaussian (log)      | –                  | –                     | 0.00087  |
| Sei whale           | Nova Scotia Stock                       | ↑                   | <i>gls</i> | Gaussian            | varFixed           | corAR1                | 0.00210  |
| <b>Carnivora</b>    |                                         |                     |            |                     |                    |                       |          |
| Guadalupe fur seal  | Guadalupe Island, Mexico                | ↑                   | <i>gls</i> | Gaussian (identity) | varIndt            | corAR1                | <0.00001 |
| Hawaiian monk seal  | NW Hawaiian Islands – (85-13)           | ↓                   | <i>gls</i> | Gaussian (identity) | varPower           | corLin                | <0.00001 |
|                     | NW Hawaiian Islands – (13-16)           | ↑                   | <i>glm</i> | Gaussian (log)      | –                  | –                     | 0.01650  |
| Northern sea otter  | Southwest Alaska DPS                    | →                   | <i>glm</i> | Gaussian (log)      | –                  | –                     | 0.08300  |

|                      |                                                                                                    |   |                  |                     |          |        |          |
|----------------------|----------------------------------------------------------------------------------------------------|---|------------------|---------------------|----------|--------|----------|
| Southern sea otter   | California                                                                                         | ↑ | <i>gls</i>       | Gaussian            | varPower | corAR1 | <0.00001 |
| Steller sea lion     | Eastern DPS (CA-SEAK )                                                                             | ↑ | <i>gls</i>       | Gaussian (identity) | varExp   | –      | <0.00001 |
| Steller sea lion     | Western DPS – (90-03)                                                                              | ↓ | <i>gam</i>       | Gaussian (log)      | –        | –      | <0.00001 |
|                      | Western DPS – (03-15)                                                                              | ↑ | <i>gam</i>       | Gaussian (log)      | –        | –      | <0.00001 |
| <b>Sirenia</b>       |                                                                                                    |   |                  |                     |          |        |          |
| Florida manatee      | Florida                                                                                            | ↑ | <i>glm</i> (log) | Gamma (log)         | –        | –      | <0.00001 |
| Antillean manatee    | Puerto Rico                                                                                        | ↑ | <i>glm</i> (log) | Gamma (log)         | –        | –      | 0.00012  |
| <b>Sea Turtles</b>   |                                                                                                    |   |                  |                     |          |        |          |
| Green turtle         | Central North Pacific DPS (East Island, French Frigate, HI) <sup>1</sup>                           | ↑ | <i>glm</i> (log) | Gaussian (identity) | –        | –      | <0.00001 |
| Green turtle         | Central West Pacific DPS (Guam waters) <sup>2</sup>                                                | → | <i>gam</i> (log) | Gaussian (identity) | –        | –      | 0.13630  |
| Green turtle         | North Atlantic DPS (Florida index beaches) <sup>3</sup>                                            | ↑ | <i>glm</i> (log) | Gaussian (identity) | –        | –      | <0.00001 |
| Green turtle         | South Atlantic DPS (Buck Reef NWR + Sandy Point NWR + Jack, Isaac, and East End Bays) <sup>1</sup> | ↑ | <i>gam</i> (log) | Gaussian (identity) | –        | –      | <0.00001 |
| Hawksbill turtle     | Atlantic DPS (Mona Island, Puerto Rico) <sup>3</sup>                                               | ↑ | <i>gam</i> (log) | Gaussian (identity) | –        | –      | <0.00001 |
| Kemp’s Ridley turtle | Texas <sup>3</sup> – (since 1980)                                                                  | ↑ | <i>gam</i> (log) | Gamma (log)         | –        | –      | <0.00001 |
| Leatherback turtle   | Atlantic DPS (Florida +Puerto Rico + Sandy Point NWR, VI) <sup>3</sup>                             | ↑ | <i>gam</i> (log) | Gaussian (log)      | –        | –      | <0.00001 |
| Loggerhead turtle    | Northwest Atlantic DPS (Peninsular FL index beaches) <sup>3</sup>                                  | → | <i>gam</i>       | Gaussian (identity) | –        | –      | 0.11360  |

<sup>1</sup> Number of nesting females

<sup>2</sup> Number of individuals

<sup>3</sup> Number of nests
