# Supplementary material for: Marine mammals and sea turtles listed under the U.S. Endangered Species Act are recovering
Source: PubMed Central journal article supplement (PMC6334928; doi:10.1371/journal.pone.0210164), 2019-01-16
Supplement: pone.0210164.s004.pdf [file pone.0210164.s004.pdf]

### GUADALUPE FUR SEAL

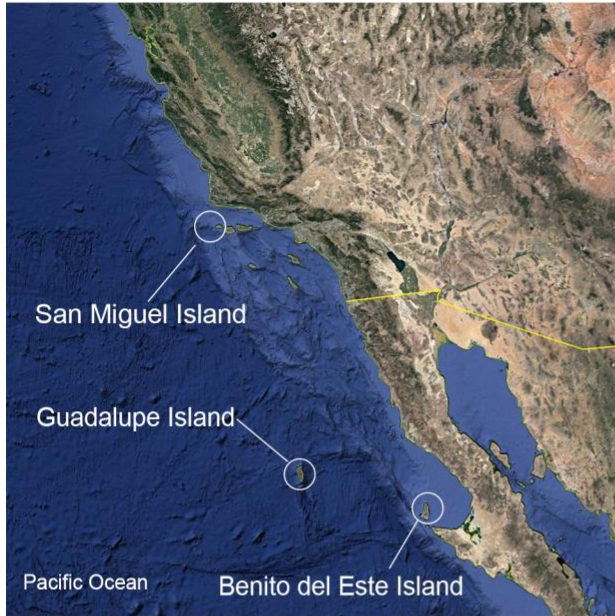

### HAWAIIAN MONK SEAL

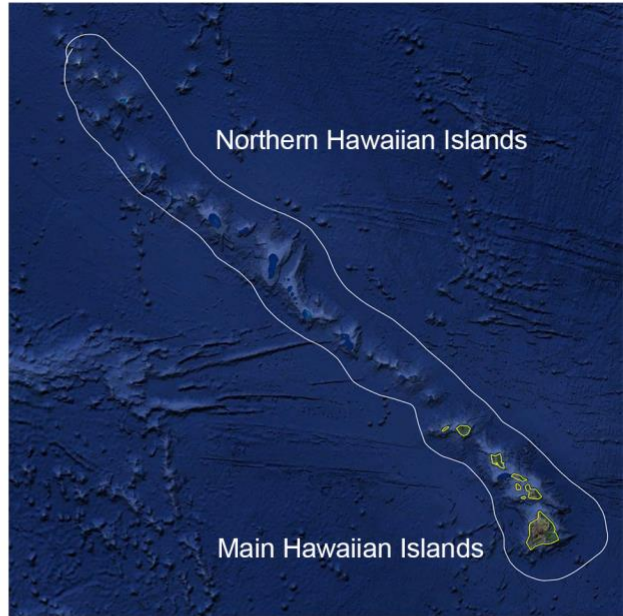

### NORTHERN SEA OTTER (SW AK DPS)

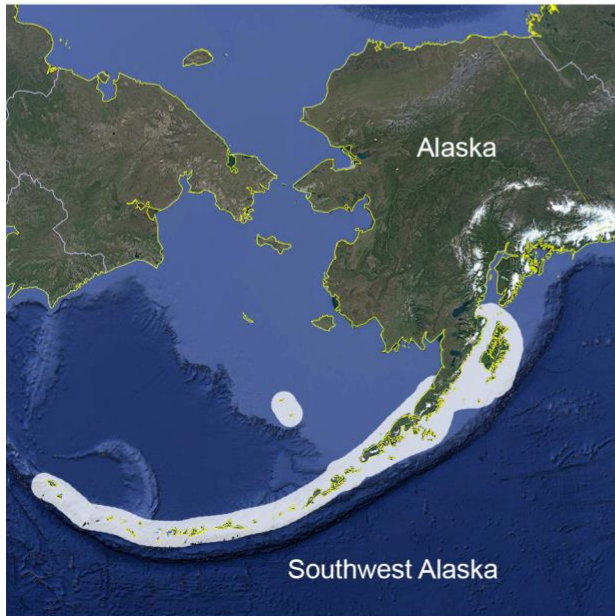

### SOUTHERN SEA OTTER (CA Pop.)

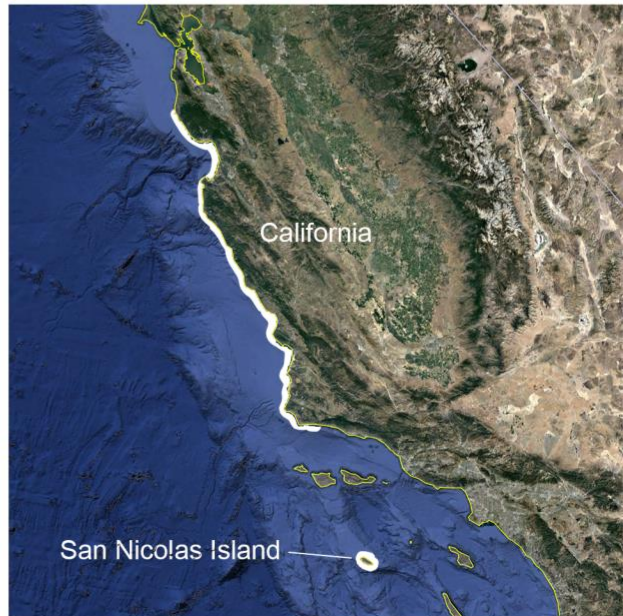

**S2 Figure.** Approximate geographic distribution (shaded area) of non-cetacean marine mammal populations analyzed in our study (*continue in next page...*).

STELLER SEA LION (Western DPS)

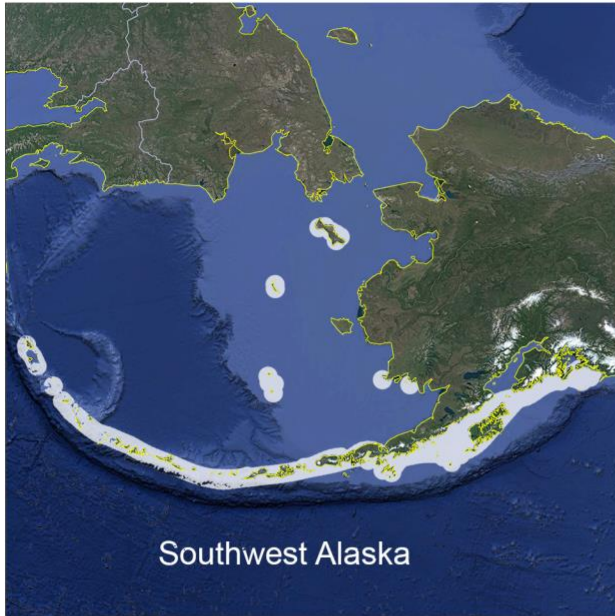

STELLER SEA LION (Eastern DPS)

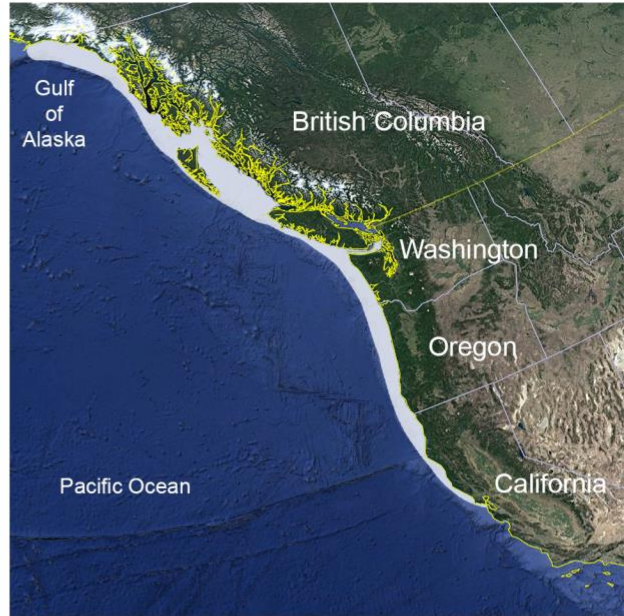

WEST INDIAN MANATEE (FL Pop.)

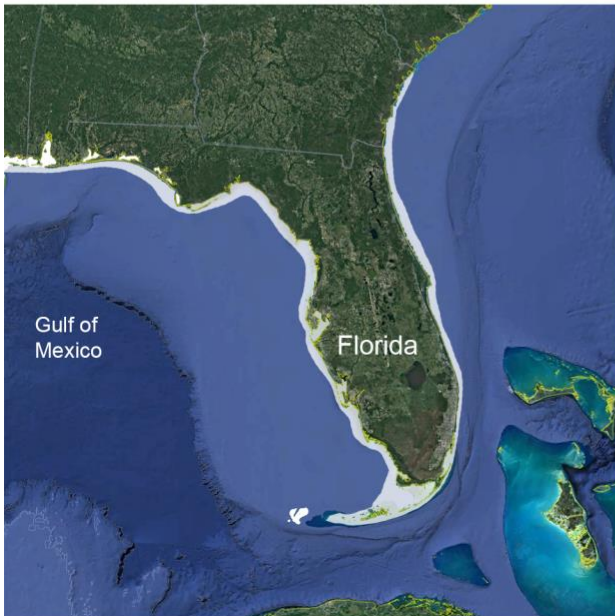

WEST INDIAN MANATEE (PR Pop.)

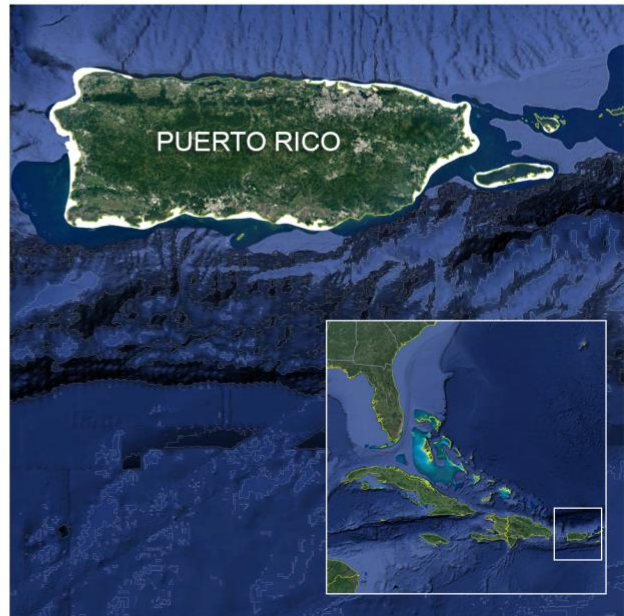

**S2 Figure.** (*cont.*) Approximate geographic distribution (shaded area) of non-cetacean marine mammal populations analyzed in our study.
