# Supplementary material for: Marine mammals and sea turtles listed under the U.S. Endangered Species Act are recovering
Source: PubMed Central journal article supplement (PMC6334928; doi:10.1371/journal.pone.0210164), 2019-01-16
Supplement: pone.0210164.s005.pdf [file pone.0210164.s005.pdf]

GREEN TURTLE (East Island, HI)

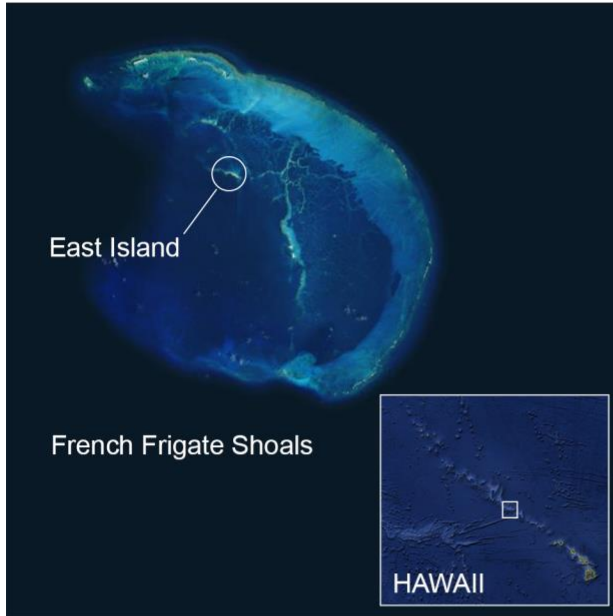

GREEN TURTLE (Guam waters)

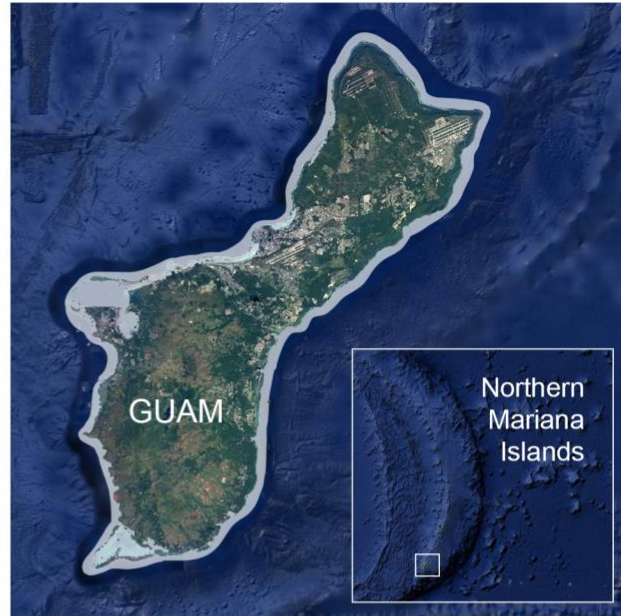

GREEN TURTLE (FL Index beaches)

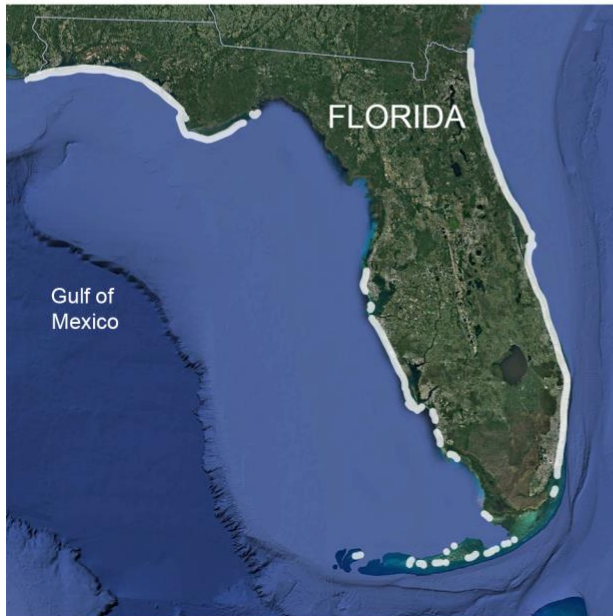

GREEN TURTLE (St. Croix, Virgin Islands)

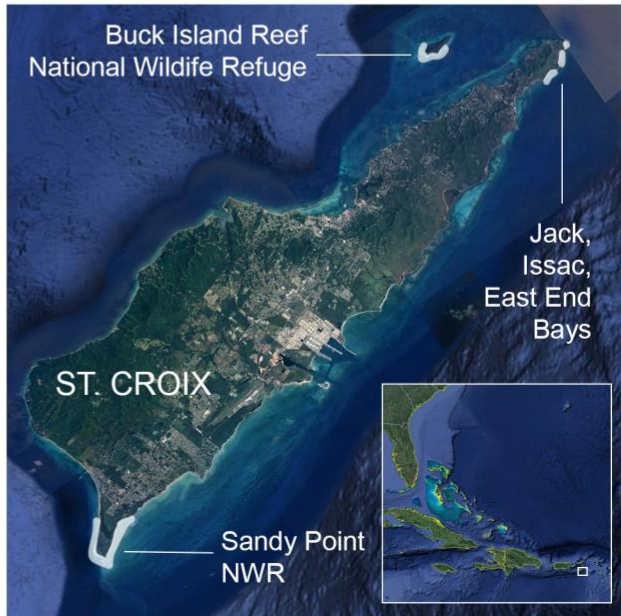

**S3 Figure.** Approximate geographic distribution (shaded area) of nesting beaches of sea turtle populations analyzed in our study (*continue in next page...*).

HAWKSBILL TURTLE (Mona Island, PR)

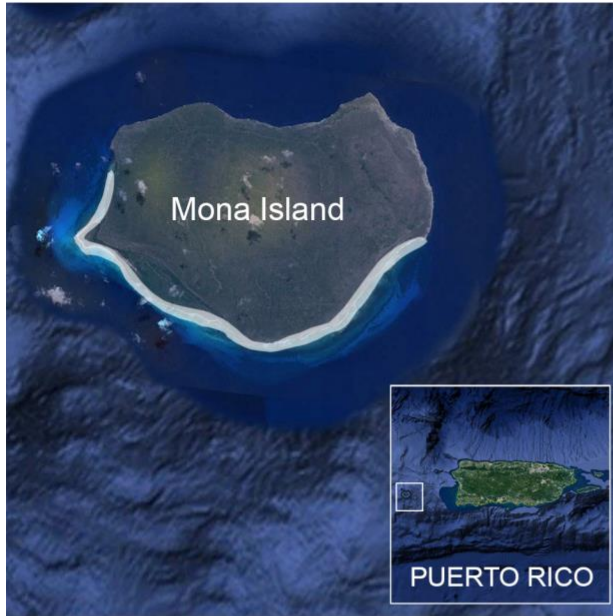

KEMP'S RIDLEY (Texas Pop.)

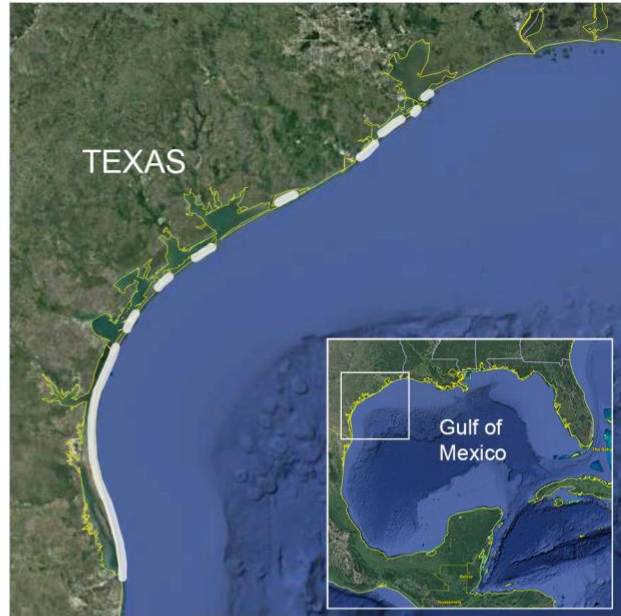

LEATHERBACK TURTLE (FL, PR, VI)

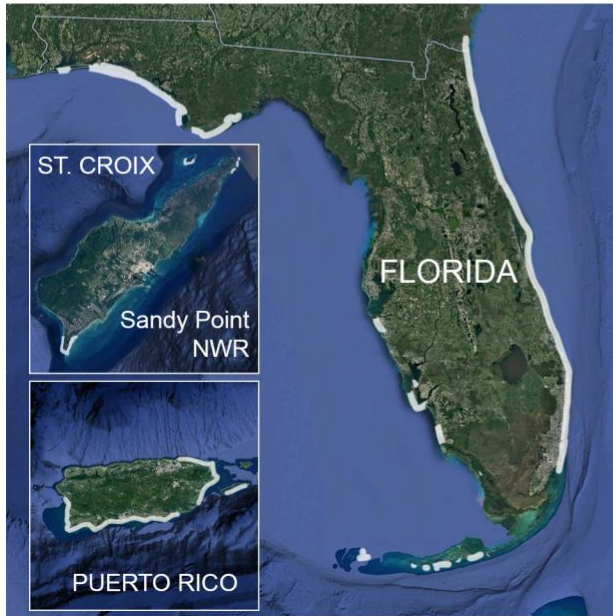

LOGGERHEAD TURTLE (FL Index b.)

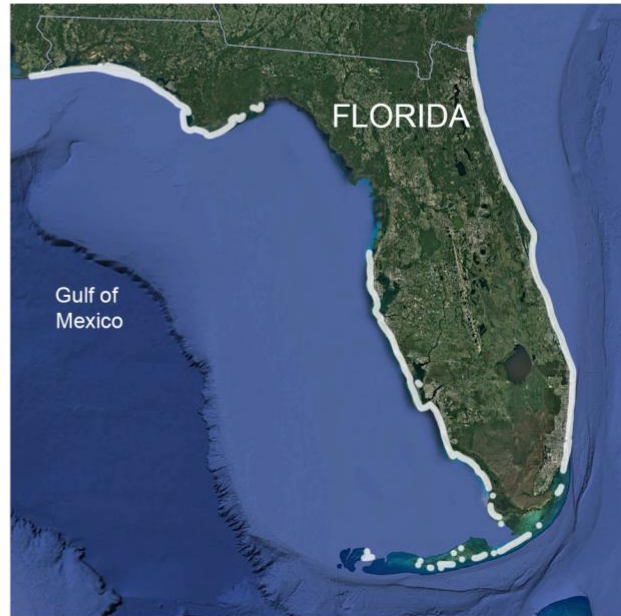

**S3 Figure.** (cont.) Approximate geographic distribution (shaded area) of nesting beaches sea turtle populations analyzed in our study.
